# Supplementary material for: Forage quality declines with rising temperatures, with implications for livestock production and methane emissions
Source: Copernicus journal article supplement (doi:10.5194/bg-14-1403-2017), 2017-03-26
Supplement: Supplementary file 1 [file bg-14-1403-2017-supplement.pdf]

Supplement of Biogeosciences, 14, 1403–1417, 2017  
<http://www.biogeosciences.net/14/1403/2017/>  
doi:10.5194/bg-14-1403-2017-supplement  
© Author(s) 2017. CC Attribution 3.0 License.

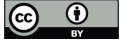

Biogeosciences  Open Access

*Supplement of*

## **Forage quality declines with rising temperatures, with implications for livestock production and methane emissions**

**Mark A. Lee et al.**

*Correspondence to:* Mark A. Lee (m.lee@kew.org)

The copyright of individual parts of the supplement might differ from the CC-BY 3.0 licence.

Table S1: Sites included in the database, detailing latitude, longitude, Mean Annual Temperature (MAT, °C), Mean Annual Rainfall (MAR, mm) and altitude (m). The site with no climatic data is indicated by an em-rule (–). Some sites did not contribute both NDF and CP values.

| Site                          | Country        | Latitude | Longitude | MAT  | MAR    | Altitude |
|-------------------------------|----------------|----------|-----------|------|--------|----------|
| Calden <sup>1</sup>           | Argentina      | -38.450  | -63.750   | 15.0 | 400.0  | 95       |
| Buenos Aires <sup>2</sup>     | Argentina      | -37.183  | -62.133   | 15.9 | 602.7  | 181      |
| Mutdapily <sup>3</sup>        | Australia      | -27.767  | 152.667   | 19.9 | 815.0  | 40       |
| Pernambuco <sup>4</sup>       | Brazil         | -8.014   | -34.951   | 25.7 | 2310.3 | 23       |
| Lacombe <sup>5</sup>          | Canada         | 52.467   | -113.733  | 2.4  | 466.0  | 855      |
| Melfort <sup>5</sup>          | Canada         | 52.817   | -104.600  | 0.7  | 439.0  | 483      |
| Alberta <sup>6</sup>          | Canada         | 53.756   | -113.339  | 3.0  | 455.8  | 674      |
| Fredericton <sup>7</sup>      | Canada         | 45.917   | -66.604   | 5.6  | 1065.0 | 26       |
| Gansu <sup>8</sup>            | China          | 37.667   | 103.533   | -1.0 | 385.7  | 3000     |
| Fodder Research <sup>9</sup>  | Czech Republic | 49.517   | 15.967    | 6.9  | 617.0  | 560      |
| Grange <sup>10,11,12,13</sup> | Ireland        | 53.500   | -6.670    | 6.3  | 877.3  | 83       |
| Moorepark <sup>14</sup>       | Ireland        | 52.163   | -8.260    | 10.0 | 1040.0 | 70       |
| Tohoku <sup>15</sup>          | Japan          | 39.733   | 141.133   | 9.3  | 1180.0 | 110      |
| Ohda <sup>16</sup>            | Japan          | 35.167   | 132.500   | 15.9 | 1603.9 | 53       |
| Sumiyoshi <sup>17</sup>       | Japan          | 31.983   | 131.467   | 17.3 | 2378.0 | 11       |
| Nuevo Leon <sup>18</sup>      | Mexico         | 25.717   | -100.033  | 22.0 | 500.0  | 393      |
| Sauces Ranch <sup>19</sup>    | Mexico         | 25.407   | -99.776   | 22.0 | 360.0  | 272      |
| Chifeng <sup>20</sup>         | Mongolia       | 42.261   | 118.931   | 4.5  | 380.0  | 900      |
| Wageningen <sup>21</sup>      | Netherlands    | 51.967   | 5.667     | 9.3  | 771.4  | 7        |
| Lincoln <sup>22</sup>         | New Zealand    | -43.633  | 172.467   | 11.5 | 581.2  | 22       |
| Waimate North <sup>23</sup>   | New Zealand    | -35.300  | 173.900   | –    | –      | 83       |
| Quassim <sup>24</sup>         | Saudi Arabia   | 26.308   | 43.767    | 24.7 | 160.6  | 652      |
| Alpine region <sup>25</sup>   | Slovenia       | 46.050   | 14.467    | 10.8 | 914.8  | 300      |
| Atatürk <sup>26</sup>         | Turkey         | 39.917   | 41.267    | 4.4  | 37.9   | 1850     |
| Black Sea <sup>27</sup>       | Turkey         | 41.244   | 36.510    | 14.6 | 709.3  | 4        |
| Erzurum <sup>28</sup>         | Turkey         | 39.906   | 41.271    | 5.7  | 409.4  | 1905     |
| Aberystwyth <sup>29</sup>     | United Kingdom | 52.367   | -4.083    | 10.0 | 1174.0 | 100      |
| Ty Gwyn <sup>30</sup>         | United Kingdom | 52.267   | -4.083    | 10.0 | 1823.8 | 257      |
| Fort Keogh <sup>31</sup>      | United States  | 46.367   | -105.083  | 8.2  | 498.3  | 719      |
| Ithaca <sup>32</sup>          | United States  | 42.440   | -76.500   | 8.4  | 963.9  | 120      |
| Logan <sup>33</sup>           | United States  | 41.767   | -111.817  | 9.1  | 509.6  | 1406     |
| Mount Pleasant <sup>32</sup>  | United States  | 41.110   | -73.810   | 11.5 | 1327.0 | 100      |

<sup>1</sup> Distel et al., 2005, <sup>2</sup> Catanese et al., 2009, <sup>3</sup> Callow et al., 2003, <sup>4</sup> dos Santos et al., 2003, <sup>5</sup> McCartney et al., 2008, <sup>6</sup> Suleiman et al., 1999, <sup>7</sup> Bélanger and Mcqueen, 1997, <sup>8</sup> Dong et al., 2003, <sup>9</sup> Skladanka et al., 2010, <sup>10</sup> Conaghan et al., 2008, <sup>11</sup> Keating and O’Kiely, 2000, <sup>12</sup> King et al., 2012, <sup>13</sup> Mценiry et al., 2014, <sup>14</sup> Beecher et al., 2015, <sup>15</sup> Nashiki et al., 2005, <sup>16</sup> Kobayashi et al., 2008, <sup>17</sup> Hirata et al., 2008, <sup>18,19</sup> Ramirez, 2007, <sup>20</sup> Zhao et al., 2012, <sup>21</sup> Smit et al., 2005, <sup>22</sup> Bryant et al., 2012, <sup>23</sup> Ulyatt et al., 2002, <sup>24</sup> Al-Ghumaiz and Motawei, 2011, <sup>25</sup> Čop et al., 2009, <sup>26</sup> Akgun et al., 2008, <sup>27</sup> Surmen et al., 2013, <sup>28</sup> Sahin et al., 2012, <sup>29</sup> Lee et al., 2001, <sup>30</sup> Weller and Cooper, 2001, <sup>31</sup> Haferkamp and Grings, 2002, <sup>32</sup> Cherney and Cherney, 1997, <sup>33</sup> Griggs et al., 2007

Table S2: Species included in the database showing NDF (% DM) and CP (% DM) mean, standard deviation (SD), maximum (Max) and minimum (Min) values. Hybridised species are denoted by a multiplication sign (x).

|                                                        | NDF (% DM) |    |     |     | CP (% DM) |    |     |     |
|--------------------------------------------------------|------------|----|-----|-----|-----------|----|-----|-----|
|                                                        | Mean       | SD | Max | Min | Mean      | SD | Max | Min |
| <i>Agropyron cristatum</i>                             | –          | –  | –   | –   | 17        | 7  | 36  | 8   |
| <i>Agropyron intermedium</i>                           | –          | –  | –   | –   | 16        | 5  | 26  | 9   |
| <i>Agropyron riparium</i>                              | –          | –  | –   | –   | 16        | 3  | 23  | 11  |
| <i>Agropyron trachycaulum</i>                          | –          | –  | –   | –   | 15        | 5  | 25  | 10  |
| <i>Agropyron trichophorum</i>                          | –          | –  | –   | –   | 16        | 5  | 27  | 11  |
| <i>Alopecurus pratensis</i>                            | 58         | 9  | 70  | 39  | 15        | 4  | 24  | 8   |
| <i>Aristida longiseta</i>                              | 87         | 1  | 88  | 85  | –         | –  | –   | –   |
| <i>Arrhenatherum elatius</i>                           | 61         | 1  | 61  | 60  | 8         | 1  | 9   | 7   |
| <i>Bouteloua curtipendula</i>                          | 74         | 3  | 79  | 72  | 11        | 3  | 14  | 8   |
| <i>Bouteloua gracilis</i>                              | 83         | 5  | 90  | 77  | –         | –  | –   | –   |
| <i>Bouteloua trifida</i>                               | 74         | 3  | 76  | 70  | 11        | 4  | 15  | 8   |
| <i>Brachiaria brizantha</i>                            | 75         | –  | 75  | 75  | 7         | –  | 7   | 7   |
| <i>Brachiaria fasciculata</i>                          | 64         | 5  | 72  | 60  | 14        | 4  | 18  | 10  |
| <i>Bromus inermis</i>                                  | –          | –  | –   | –   | 16        | 6  | 26  | 7   |
| <i>Cenchrus ciliaris</i>                               | 76         | 2  | 78  | 74  | –         | –  | –   | –   |
| <i>Cenchrus incertus</i>                               | 77         | 3  | 80  | 74  | –         | –  | –   | –   |
| <i>Chloris ciliata</i>                                 | 70         | 3  | 72  | 65  | 13        | 3  | 18  | 10  |
| <i>Dactylis glomerata</i>                              | 58         | 5  | 64  | 43  | 14        | 4  | 26  | 9   |
| <i>Digitaria insularis</i>                             | 72         | 2  | 75  | 70  | 11        | 3  | 13  | 7   |
| <i>Echinochloa crusgalli</i>                           | 64         | 2  | 66  | 63  | 11        | 1  | 12  | 10  |
| <i>Elymus nutans</i>                                   | –          | –  | –   | –   | 14        | 1  | 15  | 13  |
| <i>Elymus sibiricus</i>                                | –          | –  | –   | –   | 14        | 8  | 26  | 5   |
| <i>Elytrigia intermedia</i>                            | –          | –  | –   | –   | 20        | 9  | 32  | 6   |
| <i>Eremochloa ophiuroides</i>                          | –          | –  | –   | –   | 12        | 3  | 20  | 8   |
| <i>Festuca arundinacea</i>                             | 57         | 3  | 60  | 53  | 15        | 4  | 23  | 9   |
| <i>Festuca arundinacea</i> x <i>Lolium multiflorum</i> | 58         | 2  | 61  | 56  | 8         | 1  | 9   | 8   |
| <i>Festuca pratensis</i>                               | –          | –  | –   | –   | 11        | 1  | 12  | 11  |
| <i>Festuca rubra</i>                                   | –          | –  | –   | –   | 17        | 3  | 21  | 11  |
| <i>Hilaria belangeri</i>                               | 79         | 4  | 83  | 75  | –         | –  | –   | –   |
| <i>Holcus lanatus</i>                                  | 54         | 9  | 65  | 39  | 11        | 4  | 19  | 5   |
| <i>Hordeum brevisubulatum</i>                          | –          | –  | –   | –   | 14        | 1  | 15  | 13  |
| <i>Leptochloa filiformis</i>                           | 70         | 4  | 75  | 67  | 12        | 2  | 15  | 10  |
| <i>Lolium multiflorum</i>                              | 46         | 6  | 56  | 36  | 15        | 5  | 28  | 6   |
| <i>Lolium multiflorum</i> x <i>Festuca pratensis</i>   | –          | –  | –   | –   | 12        | 1  | 13  | 12  |
| <i>Lolium perenne</i>                                  | 50         | 8  | 62  | 34  | 18        | 8  | 34  | 7   |
| <i>Lolium perenne</i> x <i>Festuca pratensis</i>       | –          | –  | –   | –   | 11        | 0  | 11  | 10  |
| <i>Panicum hallii</i>                                  | 71         | 3  | 76  | 67  | 13        | 5  | 18  | 8   |
| <i>Panicum obtusum</i>                                 | 65         | 8  | 74  | 55  | 14        | 2  | 17  | 12  |
| <i>Pascopyrum smithii</i>                              | –          | –  | –   | –   | 18        | 6  | 26  | 7   |
| <i>Paspalum notatum</i>                                | –          | –  | –   | –   | 12        | 3  | 19  | 9   |
| <i>Paspalum unispicatum</i>                            | 68         | 2  | 70  | 64  | 11        | 3  | 13  | 9   |
| <i>Pennisetum clandestinum</i>                         | 46         | 4  | 48  | 43  | 23        | 1  | 23  | 22  |
| <i>Pennisetum maximum</i>                              | 78         | 1  | 79  | 77  | 7         | 0  | 7   | 7   |
| <i>Pennisetum purpureum</i>                            | 69         | 1  | 70  | 68  | 9         | 1  | 10  | 9   |

|                                |    |   |    |    |    |   |    |    |
|--------------------------------|----|---|----|----|----|---|----|----|
| <i>Phalaris arundinacea</i>    | 58 | 5 | 67 | 52 | –  | – | –  | –  |
| <i>Phleum pratense</i>         | 51 | 8 | 67 | 36 | 15 | 4 | 23 | 9  |
| <i>Poa crymophila</i>          | –  | – | –  | –  | 13 | 5 | 20 | 8  |
| <i>Rhynchelytrum repens</i>    | 72 | 2 | 74 | 69 | 10 | 2 | 11 | 7  |
| <i>Roegneria turczaninovii</i> | –  | – | –  | –  | 15 | 1 | 16 | 14 |
| <i>Setaria grisebachii</i>     | 72 | 8 | 81 | 61 | 14 | 4 | 17 | 9  |
| <i>Setaria macrostachya</i>    | 74 | 7 | 86 | 63 | 13 | 2 | 16 | 11 |
| <i>Stipa clarazii</i>          | 55 | 2 | 57 | 54 | 16 | 6 | 22 | 11 |
| <i>Stipa eriostachya</i>       | 66 | 6 | 69 | 59 | 10 | 5 | 16 | 7  |
| <i>Tridens eragrostoides</i>   | 73 | 2 | 76 | 71 | 13 | 2 | 17 | 11 |
| <i>Tridens muticus</i>         | 75 | 3 | 78 | 72 | 11 | 4 | 16 | 8  |

---
